# Supplementary material for: Transcriptional signature of prion-induced neurotoxicity in a Drosophila model of transmissible mammalian prion disease
Source: Oxford University Press journal article supplement (doi:10.1042/bcj20190872), 2020-02-28
Supplement: bcj-2019-0872_supp.pdf [file bcj-2019-0872_supp.pdf]

## **Supplementary data legends**

### **Supplementary data 1. Sequences of qPCR primers**

Sequences of primers used in qPCR to detect cell cycle and protein translation gene expression level.

### **Supplementary data 2. Prion-exposed PrP transgenic *Drosophila* show accelerated decline in locomotor activity**

(A) PrP(GPI); (B) PrP(Cyt); or (C) control 51D *Drosophila* crossed with the *Elav-GAL4* driver line were assessed for locomotor activity at various time points after hatching by a negative geotaxis climbing assay following exposure at the larval stage to scrapie-infected sheep (red symbols and red line) or scrapie-free (blue symbols and blue line) sheep brain homogenate. The mean performance index is shown for three groups of n=15 flies of each genotype per time point (45 flies in total for each genotype at the start of the experiment). Statistical analysis of the scrapie-infected and scrapie-free linear regression plots for each fly line was performed by the unpaired samples *t* test. (Data modified from original figure in Thackray et al. 2014, reference 26, doi: <https://doi.org/10.1042/BJ20140129>).

### **Supplementary data 3. Cell cycle:G2/M DNA damage checkpoint regulation pathway genes**

List of *Drosophila* and orthologous human genes, together with their function, involved in the cell cycle:G2/M DNA damage checkpoint regulation pathway.

### **Supplementary data 4. eIF2 signalling pathway genes**

List of *Drosophila* and orthologous human genes, together with their function, involved in the eIF2 signalling pathway.

### **Supplementary data 5. Mitochondrial dysfunction pathway genes**

List of *Drosophila* and orthologous human genes, together with their function, involved in the mitochondrial dysfunction pathway.

### **Supplementary data 6. mTOR signalling pathway genes**

List of *Drosophila* and orthologous human genes, together with their function, involved in the mTOR signalling pathway.

### Supplementary data 1. Sequences of qPCR primers

| Gene          | Primer direction | Primer sequence           |
|---------------|------------------|---------------------------|
| cdc2          | Forward          | CGTGGTGTATAAGGGTCGCA      |
| cdc2          | Reverse          | ACGAAATTTCTCTGATCGCGG     |
| dPCNA         | Forward          | GTCAAGCCACCATCCTGAAGA     |
| dPCNA         | Reverse          | CCTGTAGCTGAATGCCGGAG      |
| Cyclin A      | Forward          | AAGAGTCAAGGAGCTTCCGC      |
| Cyclin A      | Reverse          | TGTTTCTTCTCGCTCTCCCG      |
| Cyclin B      | Forward          | CACTGTAGAACCCACTAAAGTTACA |
| Cyclin B      | Reverse          | GGTCAGCGACTTCTTCGACA      |
| eIF2 $\alpha$ | Forward          | GCACCGCCACTCTATGTAATG     |
| eIF2 $\alpha$ | Reverse          | TCCATCGTACTCGCTGGTCT      |
| eIF4A         | Forward          | ATCATTCCCTGTGTGAGGGG      |
| eIF4A         | Reverse          | ATGCTCGTGTGATTGCTG        |
| eIF4E         | Forward          | CATGTTCAAAACCAGCGCCC      |
| eIF4E         | Reverse          | G TTCACCAGTCTCCTGTGGG     |
| eIF3-S10      | Forward          | TATTGAGGCGGACAAGAGCC      |
| eIF3-S10      | Reverse          | ATTCAAGCGCACCACTTCAC      |
| Actin         | Forward          | TTGGATTTACACGTCTGCCGC     |
| Actin         | Reverse          | TTGTCTACGACCAGGGCTGA      |

Supplementary data 2. Prion-exposed PrP transgenic *Drosophila* show accelerated decline in locomotor activity

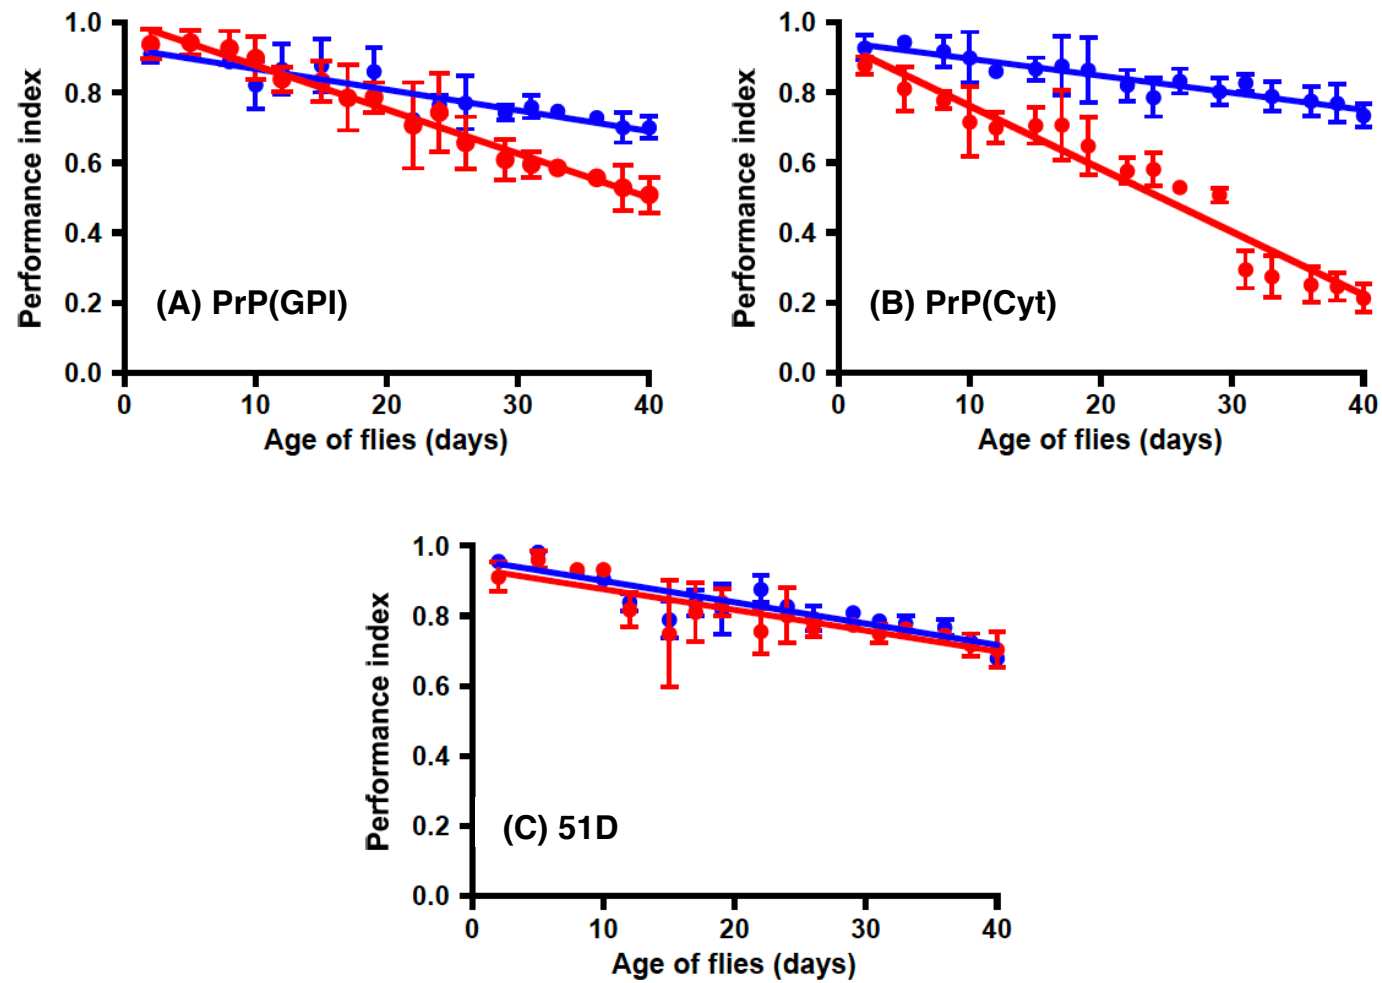

**Supplementary data 3. Cell cycle - G2/M DNA damage checkpoint regulation pathway genes**

| <b>Fly gene number</b> | <b>Fly gene name</b> | <b>Human gene name</b> | <b>Gene product</b>                                                                                           |
|------------------------|----------------------|------------------------|---------------------------------------------------------------------------------------------------------------|
| FBgn0004106            | Cdk1                 | CDK1                   | Cyclin-dependent kinase 1, activated by cyclins and controls cell cycle progression                           |
| FBgn0000405            | CycB                 | CCNB1                  | Cyclin B, binds to CDK1 and the resultant complex induces the start of mitosis                                |
| FBgn0003124            | polo                 | PLK1                   | Serine/threonine-protein kinase that functions throughout cell cycle M phase                                  |
| FBgn0019686            | lok                  | CHEK2                  | Serine/threonine-protein kinase, mediates DNA double-strand break cell cycle arrest, DNA repair and apoptosis |
| FBgn0000147            | aurA                 | AURKA                  | Mitotic serine/threonine kinase that contributes to the regulation of cell cycle progression                  |
| FBgn0284220            | Top2                 | TOP2A                  | Topoisomerase 2, alters the topology of DNA by creating a transient DNA double strand breakage                |
| FBgn0011737            | Wee1                 | WEE1                   | Non-specific protein-tyrosine kinase required for triggering entry into mitosis                               |
| FBgn0261278            | grp                  | CHEK1                  | Grp94, protein kinase that functions in a cell cycle checkpoint pathway that responds to DNA damage           |
| FBgn0263237            | Cdk7                 | CDK7                   | Cyclin-dependent kinase 7, activated by the binding to a cyclin and mediates progression through cell cycle.  |
| FBgn0037613            | Cks85A               | CKS2                   | Cyclin-dependent kinase subunit 85A, binds cyclin dependent kinases and is essential for their function       |
| FBgn0004907            | 14-3-3zeta           | YWHAZ                  | Acidic protein isoforms that function in signaling pathways, most prominently Ras/MAPK cascade.               |
| FBgn0015509            | Cul1                 | CUL1                   | Cullin 1, key assembly factor of SCF (SKP1-CUL1-F-box protein) E3 ubiquitin ligase complexes                  |
| FBgn0283468            | slmb                 | BTRC                   | Supernumerary limb, F-box component of Skp/Cullin/F-box E3 ubiquitin-ligase, promotes proteasome activity     |

Supplementary data 4. eIF2 signalling pathway genes

| Fly gene number | Fly gene name | Human gene name | Gene product                                                                                               |
|-----------------|---------------|-----------------|------------------------------------------------------------------------------------------------------------|
| FBgn0000045     | Act79B        | ACTL7A          | Actin protein isoform, structural constituent of cytoskeleton                                              |
| FBgn00039726    | eIF2Balpha    | EIF2B1          | Eukaryotic translation initiation factor 2B subunit alpha                                                  |
| FBgn0003206     | Ras64B        | RRAS2           | Ras oncogene at 64B                                                                                        |
| FBgn0015218     | eIF4E1        | EIF4E           | Eukaryotic translation initiation factor 4E1, binds the 7-methyl-guanosine cap structure of mRNA           |
| FBgn0000046     | Act87E        | ACTRT2          | Actin protein isoform, structural constituent of cytoskeleton                                              |
| FBgn0283666     | Rap2I         | RAP2C           | Ras-associated protein 2-like involved in regulation of proliferation, differentiation, and apoptosis      |
| FBgn0000044     | Act57B        | ACTRT2          | Actin protein isoform, structural constituent of cytoskeleton                                              |
| FBgn0262739     | AGO1          | AGO2            | Argonaute-1 of miRNA-induced silencing complexes (miRISCs).                                                |
| FBgn0000711     | flw           | PPP1CB          | Flapwing, serine/threonine protein phosphatase type 1β                                                     |
| FBgn0283499     | InR           | IGF1R           | Insulin-like receptor with tyrosine-protein kinase activity, required for cell survival                    |
| FBgn0001965     | Sos           | SOS1            | Ras-bound GDP/ GTP exchange factor involved in tyrosine kinases receptor signalling pathways               |
| FBgn0004103     | Pp1-87B       | PPP1CA          | Serine/threonine-protein phosphatase alpha-2 isoform                                                       |
| FBgn0037573     | CG7483        | EIF4A3          | Eukaryotic translation initiation factor 4A3                                                               |
| FBgn0010803     | TrpRS         | WARS            | Tryptophanyl-tRNA synthetase                                                                               |
| FBgn0023512     | eIF2Bepsilon  | EIF2B5          | Eukaryotic translation initiation factor 2B subunit epsilon                                                |
| FBgn0003205     | Ras85D        | HRAS            | Ras oncogene 85D protein, acts via receptor tyrosine kinases, involved in cell growth and survival         |
| FBgn0019990     | Gcn2          | EIF2AK4         | eIF-2a kinase, activator of integrated stress response, phosphorylates eIF2a to halt protein translation   |
| FBgn0261283     | SREBP         | SREBF1          | Sterol regulatory element binding protein, membrane protein and master-regulator of lipogenesis            |
| FBgn0010269     | Dsor1         | MAP2K1          | Downstream of raf1, a serine/threonine kinase that phosphorylates MAP kinase                               |
| FBgn0015278     | PI3K68D       | PIK3C2A         | Phosphatidylinositol 3 kinase 68D                                                                          |
| FBgn0020386     | Pdk1          | PDPK1           | Phosphoinositide-dependent kinase 1                                                                        |
| FBgn0026250     | eIF1A         | EIF1AX          | Eukaryotic translation initiation factor 1A                                                                |
| FBgn0037135     | CG7414        | EIF2A           | Eukaryotic translation initiation factor 2A                                                                |
| FBgn0034237     | eIF3b         | EIF3B           | Eukaryotic translation initiation factor 3 subunit b                                                       |
| FBgn0001942     | eIF4A         | EIF4A1          | Eukaryotic translation initiation factor 4A                                                                |
| FBgn0040227     | eIF3d1        | EIF3D           | Eukaryotic translation initiation factor 3 subunit d1                                                      |
| FBgn0025582     | eIF3e         | EIF3E           | Eukaryotic translation initiation factor 3 subunit e                                                       |
| FBgn0036258     | eIF3L         | EIF3L           | Eukaryotic translation initiation factor 3 subunit l, facilitates the 43S pre-initiation complex (43S PIC) |
| FBgn0040007     | RpL38         | RPL38           | Ribosomal protein L38, 60S component                                                                       |
| FBgn0033555     | RpS15Ab       | RPS15A          | Ribosomal protein S15A, 40S component                                                                      |
| FBgn0003134     | Pp1alpha-96A  | PPP1CC          | Serine/threonine-protein phosphatase alpha-1 isoform                                                       |
| FBgn0263740     | eIF2-γ        | EIF2S3          | Eukaryotic translation initiation factor 2 subunit-γ                                                       |
| FBgn0261608     | RpL37A        | RPL37A          | Ribosomal protein L37a, 60S component                                                                      |
| FBgn0003517     | sta           | RPSA            | Ribosomal protein of ≈30Kda, 40S component                                                                 |
| FBgn0004867     | RpS2 (sop)    | RPS2            | Ribosomal protein S2, 40S component                                                                        |
| FBgn0003941     | RpL40         | UBA52           | Ribosomal protein L40, 60S component                                                                       |
| FBgn0261597     | RpS26         | RPS26           | Ribosomal protein S26, 40S component                                                                       |
| FBgn0010198     | RpS15Aa       | RPS15A          | Ribosomal protein S15Aa, 40S component                                                                     |
| FBgn0285948     | RpL27A        | RPL27A          | Ribosomal protein L27A, 60S component                                                                      |
| FBgn0020910     | RpL3          | RPL3L           | Ribosomal protein L3, 60S component                                                                        |
| FBgn0039359     | RpL27         | RPL27           | Ribosomal protein L27A, 60S component                                                                      |
| FBgn0019936     | RpS20         | RPS20           | Ribosomal protein S20, 40S component                                                                       |
| FBgn0035753     | RpL18         | RPL18           | Ribosomal protein L18, 60S component                                                                       |
| FBgn0037328     | RpL35A        | RPL35A          | Ribosomal protein L35A, 60S component                                                                      |
| FBgn0035422     | RpL28         | RPL28           | Ribosomal protein L28, 60S component                                                                       |
| FBgn0028697     | RpL15         | RPL15           | Ribosomal protein L15, 60S component                                                                       |
| FBgn0034968     | RpL12         | RPL12           | Ribosomal protein L12, 60S component                                                                       |
| FBgn0003942     | RpS27A        | RPS27A          | Ribosomal protein S27A, 40S component                                                                      |
| FBgn0030616     | RpL37a        | RPL37           | Ribosomal protein L37a, 60S component                                                                      |
| FBgn0033912     | RpS23         | RPS23           | Ribosomal protein S23, 40S component                                                                       |
| FBgn0005593     | RpL7          | RPL7L1          | Ribosomal protein L7, 60S component                                                                        |
| FBgn0010265     | RpS13         | RPS13           | Ribosomal protein S13, 40S component                                                                       |
| FBgn0011284     | RpS4          | RPS4Y1          | Ribosomal protein S4, 40S component                                                                        |
| FBgn0032987     | RpL21         | RPL21           | Ribosomal protein L21, 60S component                                                                       |
| FBgn0033699     | RpS11         | RPS11           | Ribosomal protein S11, 40S component                                                                       |
| FBgn0000100     | RpLP0         | RPLP0           | Ribosomal protein LP0, 60S component                                                                       |
| FBgn0002626     | RpL32         | RPL32           | Ribosomal protein L32, 60S component                                                                       |
| FBgn0002590     | RpS5a         | RPS5            | Ribosomal protein S5a, 40S component                                                                       |
| FBgn0013325     | RpL11         | RPL11           | Ribosomal protein L11, 60S component                                                                       |
| FBgn0034743     | RpS16         | RPS16           | Ribosomal protein S16, 40S component                                                                       |
| FBgn0285950     | RpL19         | RPL19           | Ribosomal protein L19, 60S component                                                                       |
| FBgn0033902     | eIF3m         | EIF3M           | Eukaryotic translation initiation factor 3 subunit m                                                       |
| FBgn0034258     | eIF3c         | EIF3CL          | Eukaryotic translation initiation factor 3 subunit c                                                       |
| FBgn0038834     | RpS30         | FAU             | Ribosomal protein S30, 40S component                                                                       |
| FBgn0036213     | RpL10Ab       | RPL10A          | Ribosomal protein L10Ab, 60S component                                                                     |
| FBgn0064225     | RpL5          | RPL5            | Ribosomal protein L5, 60S component                                                                        |
| FBgn0002622     | RpS3          | RPS3            | Ribosomal protein S3, 40S component                                                                        |
| FBgn0022023     | eIF3h         | EIF3H           | Eukaryotic translation initiation factor 3 subunit h                                                       |

**Supplementary data 5. Mitochondrial dysfunction pathway genes**

| <b>Fly gene number</b> | <b>Fly gene name</b> | <b>Human gene name</b> | <b>Gene product</b>                                                                                                    |
|------------------------|----------------------|------------------------|------------------------------------------------------------------------------------------------------------------------|
| FBgn0000229            | bsk                  | MAPK                   | Mitogen-activated protein kinase                                                                                       |
| FBgn0039969            | Fis1                 | FIS1                   | Functions downstream of Pink1 and upstream of Drp1 to regulate mitochondrial fission                                   |
| FBgn0003308            | ry                   | XDH                    | Xanthine dehydrogenase, involved in the oxidative metabolism of purines                                                |
| FBgn0039234            | Nct                  | NCSTN                  | Subunit of g-secretase complex that catalyzes intramembrane cleavage of integral membrane proteins such as Notch       |
| FBgn0017566            | ND-75                | NDUFS1                 | NADH dehydrogenase (ubiquinone) 75 kDa subunit                                                                         |
| FBgn0024958            | Irp-1A               | ACO1                   | Iron regulatory protein 1A, a cytosolic aconitase involved in iron sensing                                             |
| FBgn0010352            | Nc73EF               | OGDHL                  | Neural conserved at 73EF, isoform I, an oxoglutarate dehydrogenase (succinyl-transferring).                            |
| FBgn0262872            | milt                 | HAP1                   | Trafficking kinesin-binding protein, required for kinesin-mediated axonal transport of mitochondria to nerve terminals |
| FBgn0031392            | AIf                  | AIFM1                  | Apoptosis inducing factor that participates in cell death and oxidative phosphorylation in mitochondria                |
| FBgn0261439            | SdhA                 | SDHA                   | Succinate dehydrogenase subunit A, encodes an FAD-containing subunit of the succinate dehydrogenase complex.           |
| FBgn0000261            | Cat                  | CAT                    | Catalase, catalyzes the decomposition of hydrogen peroxide                                                             |
| FBgn0024957            | Irp-1B               | ACO1                   | Iron regulatory protein 1B, cytosolic aconitase involved in iron ion homeostasis                                       |
| FBgn0038233            | HtrA2                | HTRA2                  | Mitochondrial serine protease that induces cell death by inhibition of anti-apoptotic proteins                         |
| FBgn0033885            | DJ-1alpha            | PARK7                  | Mitogen-activated protein kinase, acts as an oxidative stress sensor to protect against oxidative stress               |
| FBgn0041100            | park                 | PRKN                   | RBR-type E3 ubiquitin transferase, functions in the regulation of mitochondrial fission                                |
| FBgn0000447            | Dhod                 | DHODH                  | Dihydroorotate dehydrogenase, an inner mitochondrial membrane protein involved in de novo pyrimidine biosynthesis      |
| FBgn0031066            | COX6B                | COX6B2                 | Cytochrome c oxidase subunit 6B                                                                                        |
| FBgn0021967            | ND-PDSW              | NDUFB10                | NADH dehydrogenase (ubiquinone) PDSW subunit                                                                           |
| FBgn0030605            | ND-B18               | NDUFB7                 | NADH dehydrogenase (ubiquinone) B18 subunit                                                                            |
| FBgn0036728            | UQCR-Q               | UQCRCQ                 | Ubiquinol-cytochrome c reductase ubiquinone-binding protein                                                            |
| FBgn0030733            | UQCR-14              | UQCRCB                 | Ubiquinol-cytochrome c reductase 14 kDa subunit                                                                        |
| FBgn0035046            | ND-19                | NDUFA8                 | NADH dehydrogenase (ubiquinone) 19 kDa subunit                                                                         |
| FBgn0034877            | levy                 | COX6A2                 | Exhibits enzyme regulator activity, contributes to cytochrome-c oxidase activity                                       |
| FBgn0019624            | COX5A                | COX5A                  | Cytochrome c oxidase subunit 5A                                                                                        |
| FBgn0033570            | ND-B14               | NDUFA6                 | NADH dehydrogenase (ubiquinone) B14 subunit                                                                            |
| FBgn0035600            | Cyt-c1               | CYC1                   | Cytochrome c1                                                                                                          |
| FBgn0020235            | ATPsyn $\gamma$      | ATP5F1C                | ATP synthase $\gamma$ subunit                                                                                          |
| FBgn0039689            | CIA30                | NDUFAF1                | Mitochondrial complex I intermediate-associated protein 30, a chaperone required for assembly of complex I             |
| FBgn0010213            | Sod2                 | SOD2                   | Superoxide dismutase 2 (Mn) (Sod2), an enzyme that detoxifies superoxide radicals in mitochondria                      |
| FBgn0021906            | RFeSP                | UQCRCFS1               | Rieske iron-sulfur protein, predicted to contribute to ubiquinol-cytochrome-c reductase activity                       |
| FBgn0039830            | ATPsynC              | ATP5MC2                | ATP synthase, subunit C                                                                                                |
| FBgn0016120            | ATPsynD              | ATP5PD                 | ATP synthase, subunit D                                                                                                |
| FBgn0036820            | Grx1                 | GLRX2                  | Glutaredoxin 1, facilitates mitochondrial redox homeostasis during oxidative stress-induced apoptosis                  |
| FBgn0021856            | I(2)k14505           | ATPAF2                 | ATP synthase mitochondrial F1 complex assembly factor 2                                                                |
| FBgn0031771            | ND-51                | NDUFV1                 | NADH dehydrogenase (ubiquinone) 51 kDa subunit, component of mitochondrial respiratory chain Complex I                 |
| FBgn0264294            | Cyt-b5               | CYB5B                  | Cytochrome b5, a membrane-bound hemoprotein that functions in redox reactions                                          |
| FBgn0029888            | ND-ASHI              | NDUFB8                 | NADH dehydrogenase (ubiquinone) ASHI subunit of the mitochondrial membrane respiratory chain Complex I                 |
| FBgn0037873            | SdhC                 | SDHC                   | Subunit of succinate dehydrogenase located in mitochondrial electron transport chain complex II                        |
| FBgn0039802            | dj-1beta             | PARK7                  | Protein Dj-1 $\beta$ , involved in protection against reactive oxygen species                                          |
| FBgn0010217            | ATPsyn $\beta$       | ATP5F1B                | $\beta$ -subunit of the inner mitochondrial membrane F1F0 ATP synthase                                                 |
| FBgn0030718            | ND-20                | NDUFS7                 | NADH dehydrogenase (ubiquinone) 20 kDa subunit, a subunit of mitochondrial respiratory complex I                       |
| FBgn0037001            | ND-39                | NDUFA9                 | NADH dehydrogenase (ubiquinone) 39 kDa subunit, a subunit of mitochondrial respiratory complex I                       |
| FBgn0250814            | UQCR-C2              | UQCRC2                 | Ubiquinol-cytochrome c reductase core protein 2                                                                        |
| FBgn0022160            | Gpo1                 | GP2D                   | Glycerophosphate oxidase 1, mitochondrial inner membrane protein with glycerol-3 phosphate dehydrogenase activity      |
| FBgn0011211            | blw                  | ATP5F1A                | $\alpha$ -subunit of the inner mitochondrial membrane F1F0 ATP synthase                                                |
| FBgn0019957            | ND-42                | NDUFA10                | NADH dehydrogenase (ubiquinone) 42 kDa subunit, component of mitochondrial respiratory chain Complex I                 |

**Supplementary data 6. mTOR signalling pathway genes**

| <b>Fly gene number</b> | <b>Fly gene name</b> | <b>Human gene name</b> | <b>Gene product</b>                                                                               |
|------------------------|----------------------|------------------------|---------------------------------------------------------------------------------------------------|
| FBgn0003517            | sta                  | RPSA                   | 40S ribosomal protein SA, required for the assembly and/or stability of the 40S ribosomal subunit |
| FBgn0004867            | RpS2                 | RPS2                   | Ribosomal protein S2, 40S component                                                               |
| FBgn0019936            | RpS20                | RPS20                  | Ribosomal protein S20, 40S component                                                              |
| FBgn0003942            | RpS27A               | RPS27A                 | Ribosomal protein S27A, 40S component                                                             |
| FBgn0033912            | RpS23                | RPS23                  | Ribosomal protein S23, 40S component                                                              |
| FBgn0010198            | RpS15Aa              | RPS15A                 | Ribosomal protein S15Aa, 40S component                                                            |
| FBgn0261597            | RpS26                | RPS26                  | Ribosomal protein S26, 40S component                                                              |
| FBgn0034237            | elF3b                | EIF3B                  | Eukaryotic translation initiation factor 3B                                                       |
| FBgn0001942            | elF4A                | EIF4A2                 | Eukaryotic translation initiation factor 4A, RNA helicase involved in mRNA cap recognition        |
| FBgn0040227            | elF3d1               | EIF3D                  | Eukaryotic translation initiation factor 3 subunit d1, mRNA cap- binding protein                  |
| FBgn0025582            | elF3e                | EIF3E                  | Eukaryotic translation initiation factor 3 subunit e                                              |
| FBgn0036258            | elF3L                | EIF3L                  | Eukaryotic translation initiation factor 3 subunit l, facilitates the 43S pre-initiation complex  |
| FBgn0033699            | RpS11                | RPS11                  | Ribosomal protein S11, 40S component                                                              |
| FBgn0010265            | RpS13                | RPS13                  | Ribosomal protein S13, 40S component                                                              |
| FBgn0011284            | RpS4                 | RPS4X                  | Ribosomal protein S4, 40S component                                                               |
| FBgn0033902            | elF3m                | EIF3M                  | Eukaryotic translation initiation factor 3 subunit m                                              |
| FBgn0034258            | elF3c                | EIF3C                  | Eukaryotic translation initiation factor 3 subunit c                                              |
| FBgn0038834            | RpS30                | FAU                    | Fusion protein, of ubiquitin-like protein fubi and ribosomal protein S30                          |
| FBgn0002622            | RpS3                 | RPS3                   | Ribosomal protein S3, 40S component                                                               |
| FBgn0022023            | elF3h                | EIF3H                  | Eukaryotic translation initiation factor 3 subunit h                                              |
| FBgn0002590            | RpS5a                | RPS5                   | Ribosomal protein S5a, 40S component                                                              |
| FBgn0034743            | RpS16                | RPS16                  | Ribosomal protein S16, 40S component                                                              |
| FBgn0261549            | rdgA                 | DGKZ                   | Diacylglycerol kinase, mediates conversion of diacylglycerol to phosphatidic acid                 |
| FBgn0014020            | Rho1                 | RHOC                   | Ras homolog gene family member C, GTPase involved in regulation of actin cytoskeleton.            |
| FBgn0259680            | Pkcδ                 | PRKCD                  | Protein kinase C delta                                                                            |
| FBgn0283472            | S6k                  | RPS6KB1                | Ribosomal protein S6-p70-serine/threonine-protein kinase, acts downstream of mTOR signaling       |
| FBgn0283666            | Rap2l                | RAP2B                  | Ras-associated protein 2-like                                                                     |
| FBgn0004177            | mts                  | PPP2CA                 | Catalytic subunit of protein phosphatase 2A                                                       |
| FBgn0038603            | PKD                  | PRKD3                  | Protein kinase D, Calcium/calmodulin-dependent Ser/Thr kinase that regulates actin-dynamics       |
| FBgn0038744            | CG4733               | PPP2R3B                | B"/PR72 subunit of protein phosphatase 2A (PP2A) regulatory B unit                                |
| FBgn0003093            | Pkc98E               | PRKCE                  | Protein kinase C epsilon, Calcium-activated and involved in cytoskeleton control                  |
| FBgn0014011            | Rac2                 | Rac1                   | Member of Rho family of GTPases                                                                   |
| FBgn0029840            | raptor               | RPTOR                  | Raptor, component of target of rapamycin (TOR) complex 1                                          |
| FBgn0003205            | Ras85D               | KRAS                   | Ras oncogene at 85D                                                                               |
| FBgn0262866            | S6kII                | RPS6KA3                | Ribosomal protein S6 kinase II, downstream effector and regulator of the MAP kinase pathway       |
| FBgn0038588            | CG7156               | RPS6KC1                | Predicted homology with ribosomal protein S6 kinase C1                                            |
| FBgn0261854            | aPKC                 | PRKCI                  | Atypical protein kinase C, member of the conserved Par complex                                    |
| FBgn0020412            | JIL-1                | RPS6KA5                | JIL-1 kinase involved in epigenetic gene regulation                                               |
| FBgn0033935            | Sin1                 | MAPKAP1                | Stress-activated map kinase-interacting protein 1, involved in phosphorylation of Akt1            |
| FBgn0015278            | Pi3K68D              | PIK3C2A                | Phosphatidylinositol-4-Phosphate 3-Kinase Catalytic Subunit Type 2 alpha                          |
| FBgn0020386            | Pdk1                 | PDPK1                  | Phosphoinositide-dependent kinase 1                                                               |
| FBgn0003091            | Pkc53E               | PRKCA                  | Protein kinase C, brain isozyme, activated by diacylglycerol                                      |
| FBgn0033653            | CG13192              | GNB1L                  | Predicted homology with G protein subunit beta 1                                                  |
| FBgn0033555            | RpS15Ab              | RPS15A                 | Ribosomal protein S15Ab, 40S component                                                            |
| FBgn0010333            | Rac1                 | RAC1                   | Member of Rho family of GTPases                                                                   |
| FBgn0027515            | CG7115               | PPM1L                  | Mg2+ / Mn2+ protein-serine/threonine phosphatase*                                                 |
| FBgn0037573            | elF4AIII             | EIF4A3                 | Eukaryotic translation initiation factor eIF4A3                                                   |
| FBgn0003206            | Ras64B               | RRAS2                  | Ras oncogene at 64B                                                                               |
| FBgn0260972            | alc                  | PRKAB1                 | AMP-activated protein kinase (AMPK) beta subunit glycogen binding domain                          |
| FBgn0015218            | elF4E1               | EIF4E                  | Eukaryotic translation initiation factor 4E1, binds 7-methyl-guanosine cap structure of mRNA      |
| FBgn0023169            | AMPKα                | PRKAA2                 | AMP-activated protein kinase α subunit, phosphorylates and inhibits acetyl-CoA carboxylase        |
